1 Ultraviolet-A light increases mitochondrial anti-viral signaling protein in confluent  
2 human tracheal cells even at a distance from the light source

3  
4 Gabriela Leite<sup>1</sup>, Ali Rezaie<sup>1,2</sup>, Ruchi Mathur MD<sup>1,3</sup>, Gillian Barlow<sup>1</sup>, Gil Y. Melmed<sup>2</sup>, Mark  
5 Pimentel<sup>1,2\*</sup>.

6  
7 <sup>1</sup> Medically Associated Science and Technology (MAST) Program, Cedars-Sinai, Los Angeles,  
8 CA, USA.

9 <sup>2</sup> Karsh Division of Gastroenterology and Hepatology, Cedars-Sinai, Los Angeles, CA, USA.

10 <sup>3</sup> Division of Endocrinology, Diabetes and Metabolism, Department of Medicine, Cedars-Sinai,  
11 Los Angeles, CA, USA.

12  
13 \*Corresponding author

14 E-mail: [mark.pimentel@cshs.org](mailto:mark.pimentel@cshs.org).

## 1 **Abstract**

2 Mitochondrial antiviral signaling (MAVS) protein mediates innate antiviral responses,  
3 including responses to certain coronaviruses such as severe acute respiratory syndrome  
4 coronavirus-2 (SARS-CoV-2). We have previously shown that ultraviolet-A (UVA) therapy can  
5 prevent virus-induced cell death in human ciliated tracheal epithelial cells (HTEpC) infected  
6 with coronavirus-229E, and that UVA treatment results in an increase in intracellular levels of  
7 MAVS. In this study, we set out to determine the mechanisms by which UVA light can activate  
8 MAVS, and whether local UVA light application can activate MAVS at locations distant from  
9 the light source (such as via cell-to-cell communication). MAVS levels were compared in  
10 HTEpC exposed to 2 mW/cm<sup>2</sup> narrow band (NB)-UVA for 20 minutes and in unexposed  
11 controls, at 30-40% and at 100% confluency. MAVS levels were also compared in unexposed  
12 HTEpC treated with supernatants or lysates from UVA-exposed cells or from unexposed  
13 controls. Also, MAVS was assessed in different sections of confluent monolayer plates where  
14 only one section was exposed to NB-UVA. The results show that UVA increases the expression  
15 of MAVS protein. Cells in a confluent monolayer exposed to UVA were able to confer an  
16 elevation in MAVS in cells adjacent to the exposed section, and even cells in the most distant  
17 sections not exposed to UVA. In this study, human ciliated tracheal epithelial cells exposed to  
18 UVA demonstrate increased MAVS protein, and also appear to transmit this influence to distant  
19 confluent cells not exposed to light.

20

## 21 **Introduction**

22 The human body has various defense mechanisms against infections, the most well-  
23 known of which involve innate immune responses where immune cells are recruited to sites of

24 infection via cytokine signaling [1, 2]. Host intracellular responses to infection are also  
25 important, particularly in the defense against viruses. In the past decade, it has been discovered  
26 that mitochondria can mediate innate and adaptive immune responses via several mechanisms  
27 [3], including the production of mitochondrial anti-viral signaling (MAVS) protein [4].

28  
29 The MAVS protein is primarily localized to the outer membrane of the mitochondria, and  
30 transduces signals from cytoplasmic retinoic acid-inducible gene I (RIG-I)-like receptors (RLRs)  
31 that recognize viral RNA [4]. Specifically, after recognition and binding of viral components, the  
32 RLRs RIG-I and melanoma differentiation-associated gene 5 (MDA5) interact with MAVS,  
33 activating transcription factors that induce expression of proinflammatory factors and antiviral  
34 genes [4]. However, some viruses have developed mechanisms to antagonize the activation of  
35 MAVS and evade this innate immune response. For example, the SARS-CoV-2 transmembrane  
36 glycoprotein M is thought to antagonize MAVS, thus impairing MAVS-mediated innate antiviral  
37 responses [5].

38  
39 We recently showed that application of UVA light, under specific conditions, to human  
40 ciliated tracheal epithelial cells infected with CoV-229E, significantly improved cell viability  
41 and prevented virus-induced cell death, and that this was accompanied by decreases in the levels  
42 of CoV-229E spike (S) protein [6]. Moreover, cells treated with UVA light exhibited  
43 significantly increased levels of MAVS protein [6]. This suggested that UVA may activate  
44 MAVS. Further, in a first-in-human clinical trial in ventilated subjects with coronavirus disease  
45 2019 (COVID-19), a 20-minute endotracheal UVA treatment daily for 5 days resulted in  
46 significantly decreased respiratory SARS-CoV-2 viral loads [7]. Interestingly, despite time-

47 limited localized UVA therapy in this trial, average  $\log_{10}$  changes in endotracheal viral load from  
48 baseline to day 6 was -3.2, suggesting a potential antiviral phenomenon beyond immediate  
49 localized effects.

50

51 In this study, we explore the effects of narrow band (NB)-UVA light on MAVS  
52 expression in uninfected human ciliated tracheal epithelial cells *in vitro*. We also explore  
53 whether the effects of UVA light were limited to cells directly exposed to UVA, or were also  
54 seen in cells not directly exposed to UVA.

55

## 56 **Materials and methods**

### 57 **NB-UVA effects on MAVS**

58 Primary human tracheal epithelial cells isolated from the surface epithelium of human  
59 trachea (HTEpC, lot n° 454Z019.11, PromoCell GmbH, Heidelberg, Germany) were cultured at  
60 37°C (5% CO<sub>2</sub>) in 60x15mm standard tissue culture dishes (cat. 351007, Corning, NY, USA)  
61 with Airway Epithelial Cell Growth Medium (cat. C-21060, PromoCell) prepared with  
62 SupplementMix (cat. C-39165, PromoCell) and Gibco antibiotic-antimycotic solution (cat.  
63 15240096, ThermoFisher Scientific, MA, USA).

64

65 Once the cells reached 10<sup>5</sup> cells per plate (30-40% confluency), HTEpC were washed 3  
66 times with sterile 1x PBS pH 7.4 (cat. 10010072, ThermoFisher), and fresh media was added to  
67 each plate. Cells were exposed to 2 mW/cm<sup>2</sup> of NB-UVA for 20 minutes based on previously  
68 validated ideal UVA irradiation levels [6]. Unexposed cells were used as controls. After 24 hours  
69 the supernatants were collected, and cell were washed 3 times with sterile 1x PBS, pH 7.4.

70 Following the removal of any remaining PBS, cells were lysed in the plate using 1 mL of RTL  
71 buffer from an AllPrep DNA/RNA/Protein isolation kit (Qiagen, Hilden, Germany). Experiments  
72 were performed in triplicate.

73

## 74 **NB-UVA effects on MAVS signal transmission to unexposed UVA-** 75 **naïve cells**

76 To determine whether the activation of MAVS caused by exposure to NB-UVA light  
77 could be transmitted to naïve, unexposed HTEpC, and to begin to elucidate the mechanisms  
78 involved, three experiments were performed:

- 79 - To determine if an extracellular mediator was involved, supernatants from 30-40% confluent  
80 HTEpC that were exposed to NB-UVA were transferred to 30-40% confluent naïve HTEpC.
- 81 - To determine if an intracellular mediator was involved, cell lysates from 30-40% confluent  
82 HTEpC that were exposed to NB-UVA (after supernatant removal) were transferred to 30-  
83 40% confluent naïve HTEpC.
- 84 - To determine if cell-to-cell signaling was involved, areas of 100% confluent HTEpC exposed  
85 or not exposed to NB-UVA were analyzed.

86

## 87 **NB-UVA effects on MAVS signal transmission via extracellular** 88 **mediators**

89 Supernatants collected from UVA-exposed and control HTEpC from the previous  
90 experiment were transferred to a new 60x15mm tissue culture dish containing  $10^5$  naïve HTEpC  
91 (i.e. cells that were never exposed to UVA). Before receiving the supernatant from UVA-

92 exposed or control cells, the naïve HTEpC were washed 3 times with sterile 1x PBS, pH 7.4. The  
93 PBS was completely removed, and 4 mL of the supernatant collected from UVA-exposed or  
94 control HTEpC were added to the naïve cells. After 24 hours of incubation, the cells were  
95 washed 3 times, and were then lysed in the plate using 1 mL of RTL buffer from an AllPrep  
96 DNA/RNA/Protein isolation kit (Qiagen). Experiments were performed in triplicate.

97

## 98 **NB-UVA effects on MAVS signal transmission via intracellular** 99 **mediators**

100 HTEpC were cultured at 37°C (5% CO<sub>2</sub>) in 60x15mm standard tissue culture dishes (cat.  
101 351007, Corning, NY, USA) with Airway Epithelial Cell Growth Medium (cat. C-21060,  
102 PromoCell) that included SupplementMix (cat. C-39165, PromoCell) and Gibco antibiotic-  
103 antimycotic solution (cat. 15240096, ThermoFisher Scientific, MA, USA).

104

105 Once the cells reached 10<sup>5</sup> cells per plate (30-40% confluency), HTEpC were washed 3  
106 times with sterile 1x PBS pH 7.4 (cat. 10010072, ThermoFisher), and fresh media was added to  
107 each plate. Cells were exposed to 2 mW/cm<sup>2</sup> of NB-UVA for 20 minutes. Unexposed cells were  
108 used as controls. After 24 hours, the cells were washed 3 times with sterile 1x PBS, pH 7.4,  
109 scraped from the culture dishes, and transferred to a 15mL sterile tube. Cells were pelleted, and  
110 new fresh Airway Epithelial Cell Growth Medium was added. A single sterile 5 mm stainless  
111 steel bead (Qiagen) was added to each tube, and cells were lysed by vortexing the tube for 5  
112 minutes. Lysates from UVA-exposed and control HTEpC were transferred to a new 60x15mm  
113 tissue culture dish containing 10<sup>5</sup> naïve HTEpC (i.e. HTEpC that had never been exposed to  
114 UVA). Before receiving the lysate from UVA-exposed or control cells, naïve HTEpC were

115 washed 3 times with sterile 1x PBS, pH 7.4. The PBS was completely removed, and 4 mL of the  
116 lysate from either UVA-exposed or control HTEpC were added to the naïve cells. After 24 hours  
117 of incubation, the cells were washed 3 times with sterile 1x PBS and were then lysed in the plate  
118 using 1 mL of RTL buffer from an AllPrep DNA/RNA/Protein isolation kit (Qiagen).  
119 Experiments were performed four times.

120

## 121 **NB-UVA effects on MAVS signal transmission via cell-to-cell**

### 122 **signaling**

123 HTEpC were cultured at 37°C (5% CO<sub>2</sub>) in 150mm dishes (cat. 430599, Corning) with  
124 Airway Epithelial Cell Growth Medium (cat. C-21060, PromoCell) prepared with  
125 SupplementMix (cat. C-39165, PromoCell) and Gibco antibiotic-antimycotic solution (cat.  
126 15240096, ThermoFisher) until they reached 100% confluence.

127

128 On the day of NB-UVA therapy, cells were washed twice with sterile 1x PBS, pH 7.4,  
129 and fresh media was added. Each 150mm dish containing a 100% confluent monolayer of  
130 HTEpC was divided longitudinally into four sections, designated as areas 1, 2, 3 and 4,  
131 respectively (Fig 1). The NB-UVA emitting device was placed 2.3 cm from the bottom of the  
132 dish and approximately 2 mW/cm<sup>2</sup> of NB-UVA was applied to area 1 for 20 minutes (S1 Fig).  
133 Experiments were performed four times.

134

135 **Fig 1.** Schematic showing the design of experiments in which 100% confluent monolayer plates  
136 of primary tracheal epithelial cells (HTEpC) were partially exposed to 2 mW/cm<sup>2</sup> NB-UVA for

137 20 minutes. NB-UVA was only applied to area 1. After UVA therapy, cells were collected from  
138 areas 4, 3, 2 and 1 in that order.

139

140 To prevent UVA leakage to other parts of the plate during therapy, areas 2, 3 and 4 were  
141 covered with a sterile barrier which blocked the passage of light through the top and sides of the  
142 plate (S1 Fig). During the course of the therapy NB-UVA intensity was constantly checked in  
143 unexposed areas (top, bottom, and sides) of the culture plates using a UV meter (SDL470,  
144 Extech, NH), to assure there was no UVA light in these areas (S1 Fig). UVA-treated plates were  
145 then re-incubated at 37°C (5% CO<sub>2</sub>) for 24h.

146

147 UVA-treated HTEpC plates were washed 3 times with sterile 1x PBS, pH 7.4, before  
148 harvesting the cells. 10 mL of sterile 1x PBS, pH 7.4, was added to the plate, and cells from area  
149 4 were carefully scraped with a sterile Corning Cell Lifter (cat. 3008, Corning) and immediately  
150 transferred to a 15 mL sterile tube. Cells were pelleted at low speed (~1000 RPM) and lysed with  
151 one mL RTL buffer from an AllPrep DNA/RNA/Protein isolation kit (Qiagen).

152

153 The remaining UVA-exposed HTEpC from areas 1, 2 and 3 (still attached to the plate)  
154 were washed 3 times with sterile 1x PBS, pH 7.4. 10 mL of sterile 1x PBS, pH 7.4, was added to  
155 the plate and cells from area 3 were carefully scraped and lysed as described above. The same  
156 process was used to harvest the cells from areas 2 and 1 (in this order).

157

158 **Protein extraction and western blotting**



159 AllPrep DNA/RNA/Protein Mini Kits (Qiagen) were used to extract total proteins from  
160 UVA-exposed and non-exposed HTEpC from all experiments, according to the manufacturer's  
161 protocol. Total proteins were quantitated using Qubit Protein Assays (ThermoFisher) and equal  
162 loads of total protein were separated on a NuPAGE 4-12% Bis-Tris mini gel (NP0336BOX,  
163 ThermoFisher) and then transferred onto a Biotrace NT nitrocellulose membrane (27376-991,  
164 VWR). Total proteins were stained with Ponceau S solution (P7170, Sigma-Aldrich). The  
165 membrane was blocked with tris-buffered saline containing 3% bovine serum albumin (cat.  
166 A7030, Sigma-Aldrich) and 0.1% Tween 20 (P1379, Sigma-Aldrich) (TBS-T), and incubated  
167 overnight at 4°C with mouse anti-MAVS antibody (1:200; SC-166583, Santa Cruz  
168 Biotechnology) diluted in blocking solution. After washing in TBS-T, the membrane was then  
169 overlain with horseradish peroxidase (HRP)-conjugated goat anti-mouse IgG antibody (1:300;  
170 5220-0286, SeraCare), washed in TBS-T, and exposed to enhanced chemiluminescence solution  
171 (RPN2235, GE Healthcare). Immunoreactive protein bands were imaged using an iBright  
172 FL1500 instrument (ThermoFisher) and analyzed using iBright Analysis software  
173 (ThermoFisher). Samples were normalized against total protein as determined from Ponceau S  
174 staining (MilliporeSigma, St. Louis, MO, US).

175

## 176 **Statistical Analysis**

177 Graph construction and statistical analysis were performed with GraphPad Prism V. 9  
178 (GraphPad Software, CA, USA). For all experiments, immunoreactive MAVS bands from  
179 nitrocellulose membranes were normalized against total protein (Ponceau S) before statistical  
180 analysis, using iBright Analysis software (ThermoFisher). MAVS relative densities (obtained  
181 after normalization) were compared between groups applying a non-paired t-test. Comparisons

182 between each area from experiments with 100% confluent cell cultures were performed using  
183 paired t-test and ANOVA test. Significance level was set at  $p < 0.05$ .

184

## 185 **Results**

### 186 **Narrow band-UVA (NB-UVA) increases MAVS protein levels in** 187 **human non-confluent and confluent ciliated tracheal epithelial cells**

188 Levels of MAVS were analyzed in primary tracheal epithelial cells (HTEpC) at 30-40%  
189 confluency which were exposed to  $2 \text{ mW/cm}^2$  NB-UVA for 20 minutes and in unexposed  
190 controls. Normalized MAVS levels, as detected by western blot, were increased in NB-UVA  
191 exposed cells when compared to unexposed controls ( $P=0.0193$ , Fig 2).

192

193 **Fig 2.** Normalized MAVS levels in 30-40% confluent HTEpC exposed to  $2 \text{ mW/cm}^2$  NB-UVA  
194 for 20 minutes, and in unexposed controls.

195

196 In addition, when primary tracheal epithelial cells were grown in 100% confluent  
197 monolayers (as opposed to 30-40% confluency), normalized MAVS levels in area 1 were also  
198 significantly increased following exposure to  $2 \text{ mW/cm}^2$  NB-UVA for 20 minutes, when  
199 compared to levels in unexposed monolayers ( $P=0.0006$ , Fig 3, S2 Fig).

200

201 **Fig 3.** Normalized MAVS levels in 100% confluent HTEpC area 1 exposed to  $2 \text{ mW/cm}^2$  NB-  
202 UVA for 20 minutes, and in unexposed monolayer controls.

203

## 204 **MAVS is activated by cell-to-cell signaling after NB-UVA exposure**

205 When naïve 30-40% confluent HTEpC were treated with supernatants from NB-UVA  
206 exposed 30-40% confluent HTEpC, no changes in MAVS levels were observed ( $P=0.4022$ , Fig  
207 4). However, when naïve 30-40% confluent HTEpC were incubated with cell lysates from NB-  
208 UVA exposed 30-40% confluent HTEpC, normalized levels of MAVS tended to increase (Fig 5,  
209  $P=0.1256$ ).

210  
211 **Fig 4. A** – Normalized MAVS levels in 30-40% confluent naïve HTEpC treated with  
212 supernatants from 30-40% confluent NB-UVA exposed HTEpC, and in controls incubated with  
213 supernatants from unexposed 30-40% confluent HTEpC. **B** - Western blot of proteins extracted  
214 from 30-40% confluent naïve HTEpC treated with supernatant from 30-40% confluent NB-UVA  
215 exposed HTEpC (lanes 1, 2 and 3), and from controls treated with supernatant from 30-40%  
216 confluent unexposed HTEpC (lanes 4, 5 and 6).

217  
218 **Fig 5. A** – Normalized MAVS levels in 30-40% confluent naïve HTEpC treated with lysates from  
219 30-40% confluent NB-UVA exposed HTEpC, and in controls incubated with lysates from 30-  
220 40% confluent unexposed HTEpC. **B** – Western blot prepared directly from lysates of 30-40%  
221 confluent naïve HTEpC incubated with lysates from 30-40% confluent NB-UVA exposed cells  
222 (lanes 1 to 4) and from lysates of controls incubated with lysates from 30-40% confluent  
223 unexposed HTEpC (lanes 5 to 8).

224  
225 Next, levels of MAVS were analyzed in different areas of culture plates containing 100%  
226 confluent monolayers of HTEpC, after only one part of the plate (area 1) was exposed to 2

227 mW/cm<sup>2</sup> NB-UVA for 20 min (Fig 1). Normalized MAVS levels gradually increased from area  
228 4 (farthest unexposed area) through area 1 (exposed to NB-UVA) (ANOVA P=0.08, Fig 6A,B),  
229 and there was a statistically significant increase in MAVS levels in area 1 (exposed to NB-UVA)  
230 when compared to unexposed area 4 (P=0.0382, Fig 6A,B). Importantly, levels of MAVS were  
231 also significantly increased in unexposed areas 2 and 3 when compared to controls from  
232 unexposed plates (P=0.0289 and P=0.0402 respectively, Fig 6A). Normalized MAVS levels in  
233 area 4 (farthest unexposed area) also appeared to be higher than in controls, but did not reach  
234 statistical significance (P=0.1262, Fig 6A).

235  
236 **Fig 6. A** – Normalized MAVS levels in 100% confluent HTEpC partially exposed to 2mW/cm<sup>2</sup>  
237 NB-UVA for 20 minutes. Area 1 was directly exposed to NB-UVA, but areas 2, 3 and 4 were not  
238 exposed to NB-UVA. **B** – Western blot prepared from cell lysates of 100% confluent HTEpC  
239 from three experiments, exposed to NB-UVA (area 1 - lanes 1, 5 and 9) and from lysates of  
240 confluent HTEpC not exposed to NB-UVA from the same culture plate (area 2 - lanes 2, 6 and  
241 10; area 3 - lanes 3, 7 and 11; area 4 - lanes 4, 8, and 12).

242

## 243 Discussion

244 In this study, we show that narrow band UVA light increases the expression of the  
245 MAVS protein in uninfected human ciliated tracheal epithelial cells *in vitro*. In addition, in a  
246 confluent monolayer culture of these cells, the induction of MAVS protein is transmitted to cells  
247 not directly exposed to NB-UVA light. This transmission does not appear to be due to a secreted  
248 extracellular mediator, but more likely results from direct cell-to-cell signaling, and possibly a  
249 cytosolic mediator.

250

251 External UVA therapy has long been used in the treatment of skin conditions such as  
252 psoriasis, eczema and skin lymphoma, for which it is FDA-approved [8-11]. To explore the  
253 potential of internal UVA light therapy to treat microbial infections, we recently tested UVA  
254 efficacy against a variety of pathogens *in vitro*, and found that under controlled and monitored  
255 conditions, UVA light effectively reduced a variety of bacterial species (including *Klebsiella*  
256 *pneumoniae*, *Escherichia coli*, *Clostridioides difficile*, and others), the yeast *Candida albicans*,  
257 coxsackievirus group B, and coronavirus-229E [6]. Importantly, we found that human ciliated  
258 tracheal epithelial cells that were infected with coronavirus-229E and then treated with NB-UVA  
259 light *in vitro* exhibited increases in MAVS protein and survived infection [6]. These results  
260 suggested that the increased cell viability of coronavirus-229E-infected and UVA-treated cells,  
261 as compared to infected but untreated controls, might be due to activation of MAVS-mediated  
262 antiviral signaling pathways. In the present study, human ciliated tracheal epithelial cells were  
263 exposed to UVA light, without viral infection. The results confirmed that exposure to UVA light  
264 alone results in increased levels of the MAVS protein in these cells, demonstrating that this is a  
265 response to UVA light.

266

267 It is well recognized that the common cold, influenza and other viruses are seasonal and  
268 occur more often in winter and less in summer months. The mechanism for this is unclear,  
269 although data suggest that sunlight, and the production of vitamin D, may be important. Sunlight  
270 has historical importance in medicine – for example, during the H1N1 influenza pandemic of  
271 1918–1919, it was suggested that the combination of access to sunlight and fresh air, together  
272 with strict hygiene and the use of face masks, may have lessened mortality among patients and

273 staff at an ‘open-air’ hospital in Boston [12]. A systematic review of data regarding vitamin D  
274 levels and the current COVID-19 pandemic suggests that sunlight and elevated vitamin D levels  
275 may improve outcomes [13]. Although the trials selected for inclusion in the latter study had  
276 heterogenous results, these and other historical data [12] suggest that exposure to sunlight, and  
277 thus to UVA, may be beneficial in combating viral infections.

278  
279 Under normal physiologic conditions, MAVS protein levels are low, due in part to  
280 binding of human antigen R as well as microRNAs to elements in the 3’UTR of the MAVS  
281 mRNA [4]. Following recognition and binding of viral components, the N-terminal caspase  
282 recruitment domains (CARDs) of RLRs are ubiquitinated and bind to the CARD of MAVS,  
283 leading to aggregation of MAVS and activation of proinflammatory cytokines and antiviral  
284 interferon genes [4]. However, viruses can also evade these pathways – for example, the  
285 membrane glycoprotein M of SARS-CoV-2, the virus which causes COVID-19 [14], can interact  
286 with MAVS and impair MAVS aggregation and activation of antiviral responses [5]. In our  
287 preclinical studies, tracheal cells that were infected with CoV-229E and treated with UVA light  
288 also exhibited decreases in CoV-229E spike protein [6], which suggested to us that UVA light  
289 might also be an effective treatment for SARS-CoV-2.

290  
291 The primary site of SARS-CoV-2 infection is the ciliated epithelial cells, associated with  
292 downstream characteristic bilateral ground-glass opacities [15]. The acute respiratory viral  
293 infection and subsequent inflammatory responses can result in compromised pulmonary function  
294 [14, 16-18] and death [19]. Secondary bacterial and fungal infections are also common, with  
295 ventilator-associated pneumonia (VAP) occurring in 31% of mechanically ventilated patients

296 [20]. To test the safety and efficacy of UVA light as a potential treatment for SARS-CoV-2, we  
297 developed a novel UVA light emitting diode (LED)-based catheter device which can be inserted  
298 into an endotracheal tube to deliver UVA light in critically ill COVID-19 subjects [7]. In the first  
299 human study of mechanically ventilated COVID-19 subjects, all of whom had World Health  
300 Organization (WHO) symptom severity scores of 9 at baseline (10 is death) [21], subjects who  
301 were treated with endotracheally-delivered UVA light (treated for 20 minutes daily for 5 days)  
302 exhibited an average  $\log_{10}$  decrease in SARS-CoV-2 viral load of 3.2 ( $p < 0.001$ ) by day 6 of  
303 therapy in endotracheal aspirates, and these accelerated reductions in viral loads correlated with  
304 30-day improvements in the WHO symptom severity scores [7]. Moreover, the scale of the  
305 improvements, despite the fact that only small portions of the trachea were exposed to UVA  
306 light, suggested the possibility that the antiviral effects of UVA light might not be confined to  
307 cells directly exposed to UVA, but might also be transmitted to neighboring cells.

308  
309 To explore the potential mechanisms underlying this transmission, we first took  
310 supernatants from UVA-exposed cells and added them to fresh plates of cells that were never  
311 exposed to UVA light. No increase in MAVS protein levels were seen in these cells, indicating  
312 that a secreted extracellular mediator was not involved. Next, to explore whether a cytosolic  
313 mediator was involved, we lysed UVA-exposed cells and non-exposed controls and added the  
314 lysates to fresh plates of cells that were never exposed to UVA light. There was a trend towards  
315 an increase in MAVS protein levels in naïve HTEpC incubated with lysates from UVA-exposed  
316 cells, but this did not reach significance. In contrast, when we compared MAVS levels in  
317 confluent monolayers of HTEpC directly exposed to UVA light and in adjacent areas from the  
318 same plate that were blocked from UVA light, we found that MAVS was not only increased in

319 cells in area 1 (directly exposed to UVA light), but was also increased in cells in the adjacent  
320 areas 2, 3, and 4 which were blocked from direct UVA light, in a gradient that decreased with  
321 increasing distance from UVA-exposed cells. These findings confirm that an increase in MAVS  
322 in response to UVA light can be transmitted from directly exposed cells to neighboring  
323 unexposed cells, and suggest that cell-to-cell signaling is involved, although further work is  
324 required to determine the mechanisms involved.

325  
326         While this study is provocative, future studies are needed to explore the potential of UVA  
327 to enhance innate intracellular immunity to viruses. For example, as already stated, SARS-CoV-  
328 2 suppresses MAVS. Understanding the mechanisms by which UVA light overrides this  
329 suppression would be important. This could include damage to single-stranded viral RNA. In  
330 addition, the effects of this MAVS activation might be important to study with *in vivo* models.  
331 Limited data suggest that MAVS and resultant intracellular production of interferon  $\alpha$  might  
332 attract circulating immune cellular response to attack infected cells [4]. Interestingly, in our  
333 previous *in vitro* study, CoV-229E caused precipitous cell death which was mitigated by UVA  
334 [6]. This increased cell survival suggests that perhaps MAVS is a cell salvage pathway. This is  
335 also supported by the first in human study of UVA in intubated critically ill subjects with  
336 COVID-19 [7]. Two patients underwent bronchoscopy after 5 days of UVA application. There  
337 was no macroscopic evidence of inflammation. Further studies are needed to explore these  
338 concepts not addressed in this current study.

339  
340         In conclusion, this study begins to unravel the possible mechanisms by which UVA light  
341 could influence innate intracellular immunity. It appears that NB-UVA increases MAVS protein



342 levels in human ciliated tracheal epithelial cells. This increase in MAVS protein appears to be  
343 transmissible to adjacent cells not directly exposed to UVA light. Further, our results suggest that  
344 MAVS signal transmission involves cell-to-cell communication, and possibly a cytosolic (but not  
345 a secreted extracellular) mediator. This finding may underlie the benefits of UVA seen *in vitro*  
346 and in human studies of critically ill patients with COVID-19. The findings could have wide-  
347 ranging implications for the treatment of SARS-CoV-2, other coronaviruses and other RNA  
348 respiratory viruses such as influenza. Further work is needed to determine if this mechanism is  
349 an important factor in the seasonality of specific respiratory viral illnesses.

350

## 351 **Acknowledgments**

352 The authors thank Chandrima Chatterjee for her assistance in preparing the figures. We  
353 would also like to thank Ewan Seo for applying our ideas to paper in the early CAD drawings for  
354 the human UVA intra-tracheal device. In addition, the authors thank Frank Lee for his support of  
355 the MAST Program's COVID-19 research. Finally, we would like to thank Aytu Biosciences for  
356 their commitment to examining this technology in critically ill human subjects.

357

## 358 **References**

- 359 1. Sarma JV, Ward PA. The complement system. *Cell Tissue Res.* 2011;343(1):227-35. Epub  
360 2010/09/15. doi: 10.1007/s00441-010-1034-0. PubMed PMID: 20838815; PubMed Central  
361 PMCID: 3097465.
- 362 2. Merle NS, Noe R, Halbwachs-Mecarelli L, Fremeaux-Bacchi V, Roumenina LT.  
363 Complement System Part II: Role in Immunity. *Front Immunol.* 2015;6:257. Epub

- 364 2015/06/16. doi: 10.3389/fimmu.2015.00257. PubMed PMID: 26074922; PubMed Central  
365 PMCID: 4443744.
- 366 3. Mohanty A, Tiwari-Pandey R, Pandey NR. Mitochondria: the indispensable players in  
367 innate immunity and guardians of the inflammatory response. *J Cell Commun Signal*.  
368 2019;13(3):303-18. Epub 2019/02/06. doi: 10.1007/s12079-019-00507-9. PubMed PMID:  
369 30719617; PubMed Central PMCID: 6732146.
- 370 4. Ren Z, Ding T, Zuo Z, Xu Z, Deng J, Wei Z. Regulation of MAVS Expression and  
371 Signaling Function in the Antiviral Innate Immune Response. *Front Immunol*.  
372 2020;11:1030. Epub 2020/06/17. doi: 10.3389/fimmu.2020.01030. PubMed PMID:  
373 32536927; PubMed Central PMCID: 7267026.
- 374 5. Fu YZ, Wang SY, Zheng ZQ, Yi H, Li WW, Xu ZS, et al. SARS-CoV-2 membrane  
375 glycoprotein M antagonizes the MAVS-mediated innate antiviral response. *Cell Mol*  
376 *Immunol*. 2020. Epub 2020/10/29. doi: 10.1038/s41423-020-00571-x. PubMed PMID:  
377 33110251; PubMed Central PMCID: 7588591.
- 378 6. Rezaie A, Leite GGS, Melmed GY, Mathur R, Villanueva-Millan MJ, Parodi G, et al.  
379 Ultraviolet A light effectively reduces bacteria and viruses including coronavirus. *PLoS*  
380 *One*. 2020;15(7):e0236199. Epub 2020/07/17. doi: 10.1371/journal.pone.0236199. PubMed  
381 PMID: 32673355; PubMed Central PMCID: 7365468.
- 382 7. Rezaie A, Melmed GY, Leite G, Mathur R, Takakura W, Pedraza I, et al. Endotracheal  
383 application of ultraviolet A light in critically ill severe acute respiratory syndrome  
384 coronavirus-2 patients: A first-in-human study. *medRxiv*. 2021:2021.03.05.21252997. doi:  
385 10.1101/2021.03.05.21252997.
- 386 8. Bhutani T, Liao W. A Practical Approach to Home UVB Phototherapy for the Treatment of

- 387 Generalized Psoriasis. *Pract Dermatol*. 2010;7(2):31-5. Epub 2010/08/01. PubMed PMID:  
388 25191138; PubMed Central PMCID: 4151182.
- 389 9. Zhang P, Wu MX. A clinical review of phototherapy for psoriasis. *Lasers Med Sci*.  
390 2018;33(1):173-80. Epub 2017/10/27. doi: 10.1007/s10103-017-2360-1. PubMed PMID:  
391 29067616; PubMed Central PMCID: 5756569.
- 392 10. Patrizi A, Raone B, Ravaioli GM. Safety and Efficacy of Phototherapy in the Management  
393 of Eczema. *Adv Exp Med Biol*. 2017;996:319-31. Epub 2017/11/11. doi: 10.1007/978-3-  
394 319-56017-5\_27. PubMed PMID: 29124712.
- 395 11. Tarabadkar ES, Shinohara MM. Skin Directed Therapy in Cutaneous T-Cell Lymphoma.  
396 *Front Oncol*. 2019;9:260. Epub 2019/04/30. doi: 10.3389/fonc.2019.00260. PubMed  
397 PMID: 31032224; PubMed Central PMCID: 6470180.
- 398 12. Hobday RA, Cason JW. The open-air treatment of pandemic influenza. *Am J Public*  
399 *Health*. 2009;99 Suppl 2:S236-42. Epub 2009/05/23. doi: 10.2105/AJPH.2008.134627.  
400 PubMed PMID: 19461112; PubMed Central PMCID: 4504358.
- 401 13. Yisak H, Ewunetei A, Kefale B, Mamuye M, Teshome F, Ambaw B, et al. Effects of  
402 Vitamin D on COVID-19 Infection and Prognosis: A Systematic Review. *Risk Manag*  
403 *Healthc Policy*. 2021;14:31-8. Epub 2021/01/16. doi: 10.2147/RMHP.S291584. PubMed  
404 PMID: 33447107; PubMed Central PMCID: 7800698.
- 405 14. Huang C, Wang Y, Li X, Ren L, Zhao J, Hu Y, et al. Clinical features of patients infected  
406 with 2019 novel coronavirus in Wuhan, China. *Lancet*. 2020;395(10223):497-506. Epub  
407 2020/01/28. doi: 10.1016/S0140-6736(20)30183-5. PubMed PMID: 31986264.
- 408 15. Song F, Shi N, Shan F, Zhang Z, Shen J, Lu H, et al. Emerging 2019 Novel Coronavirus  
409 (2019-nCoV) Pneumonia. *Radiology*. 2020;295(1):210-7. Epub 2020/02/07. doi:

- 410 10.1148/radiol.2020200274. PubMed PMID: 32027573; PubMed Central PMCID:  
411 7233366.
- 412 16. Xu Z, Shi L, Wang Y, Zhang J, Huang L, Zhang C, et al. Pathological findings of COVID-  
413 19 associated with acute respiratory distress syndrome. *Lancet Respir Med*. 2020;8(4):420-  
414 2. Epub 2020/02/23. doi: 10.1016/S2213-2600(20)30076-X. PubMed PMID: 32085846.
- 415 17. Chen N, Zhou M, Dong X, Qu J, Gong F, Han Y, et al. Epidemiological and clinical  
416 characteristics of 99 cases of 2019 novel coronavirus pneumonia in Wuhan, China: a  
417 descriptive study. *Lancet*. 2020;395(10223):507-13. Epub 2020/02/03. doi: 10.1016/S0140-  
418 6736(20)30211-7. PubMed PMID: 32007143.
- 419 18. Shi H, Han X, Jiang N, Cao Y, Alwalid O, Gu J, et al. Radiological findings from 81  
420 patients with COVID-19 pneumonia in Wuhan, China: a descriptive study. *Lancet Infect*  
421 *Dis*. 2020;20(4):425-34. Epub 2020/02/28. doi: 10.1016/S1473-3099(20)30086-4. PubMed  
422 PMID: 32105637; PubMed Central PMCID: 7159053.
- 423 19. Grasselli G, Zangrillo A, Zanella A, Antonelli M, Cabrini L, Castelli A, et al. Baseline  
424 Characteristics and Outcomes of 1591 Patients Infected With SARS-CoV-2 Admitted to  
425 ICUs of the Lombardy Region, Italy. *JAMA*. 2020. Epub 2020/04/07. doi:  
426 10.1001/jama.2020.5394. PubMed PMID: 32250385; PubMed Central PMCID: 7136855.
- 427 20. Zhou F, Yu T, Du R, Fan G, Liu Y, Liu Z, et al. Clinical course and risk factors for  
428 mortality of adult inpatients with COVID-19 in Wuhan, China: a retrospective cohort  
429 study. *Lancet*. 2020;395(10229):1054-62. Epub 2020/03/15. doi: 10.1016/S0140-  
430 6736(20)30566-3. PubMed PMID: 32171076.
- 431 21. W. H. O. Working Group on the Clinical Characterisation and Management of Covid-19  
432 infection. A minimal common outcome measure set for COVID-19 clinical research.

433 Lancet Infect Dis. 2020;20(8):e192-e7. Epub 2020/06/17. doi: 10.1016/S1473-  
434 3099(20)30483-7. PubMed PMID: 32539990; PubMed Central PMCID: 7292605.

435

## 436 **Supporting information**

437 **S1 Fig.** Monolayer plates of primary tracheal epithelial cells (HTEpC) partially exposed to NB-  
438 UVA. No UVA light was detected in unexposed areas of the plate (i.e. areas 2, 3, and 4).

439 **S2 Fig.** Western blot of proteins extracted from 100% confluent HTEpC exposed to NB-UVA  
440 (lanes 1, 2 and 4), and 100% confluent HTEpC that were not exposed to NB-UVA (Lanes 5, 6  
441 and 7). Lane 3 (exposed to NB-UVA) was discarded due to poor total protein magnification.

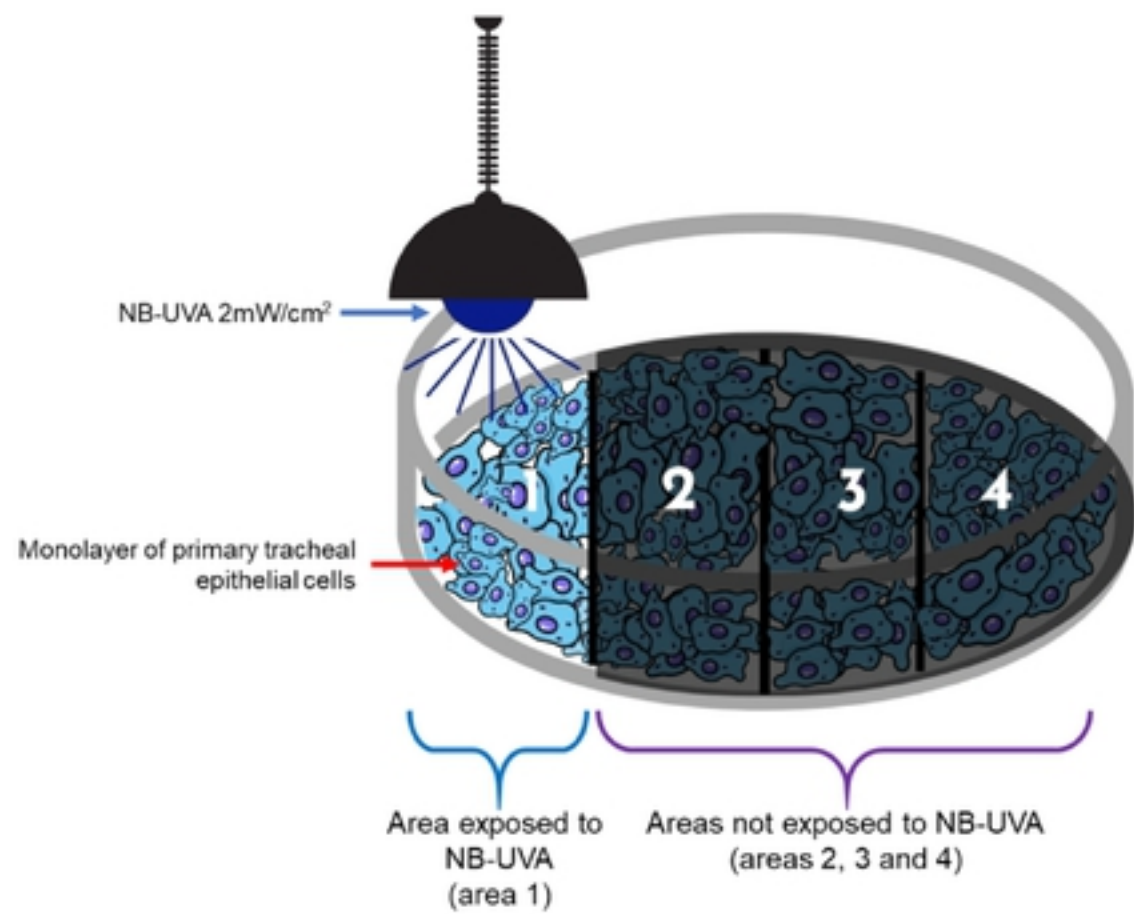

Figure 1

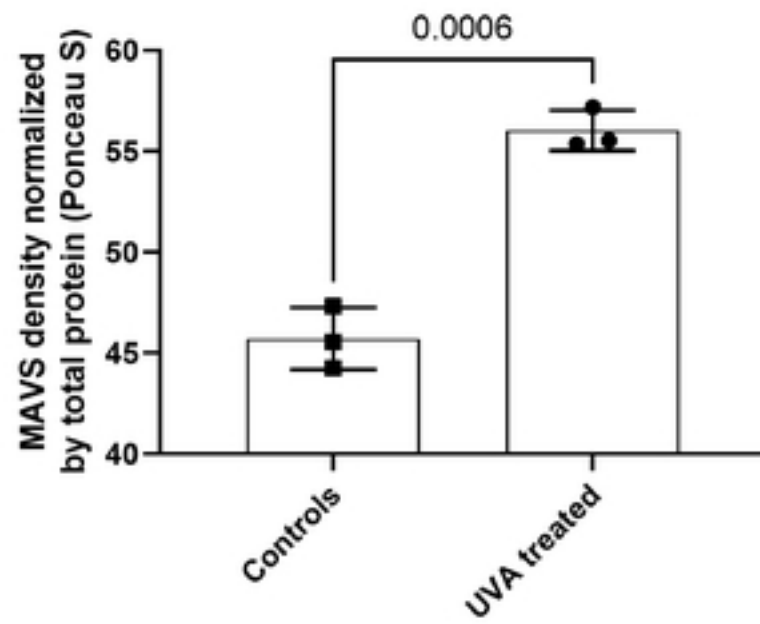

Figure 3

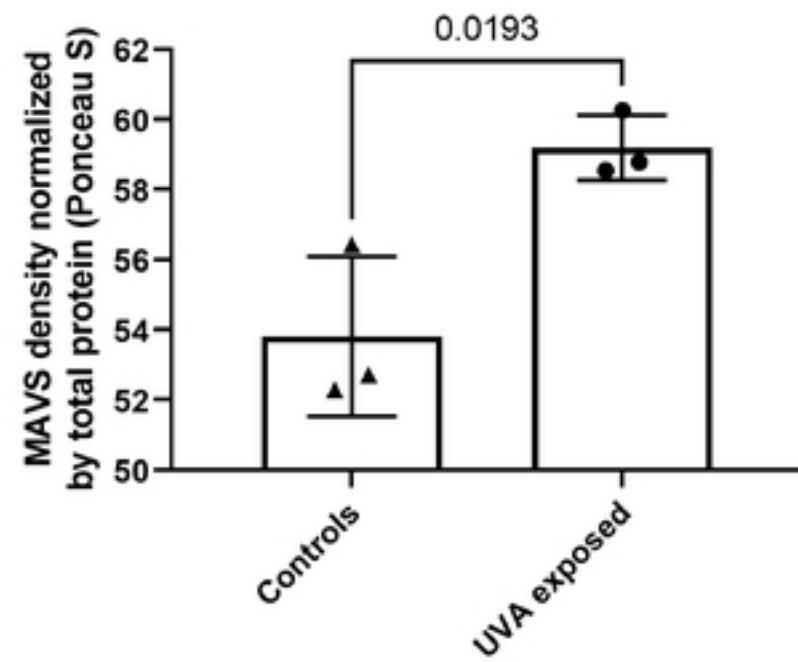

Figure 2



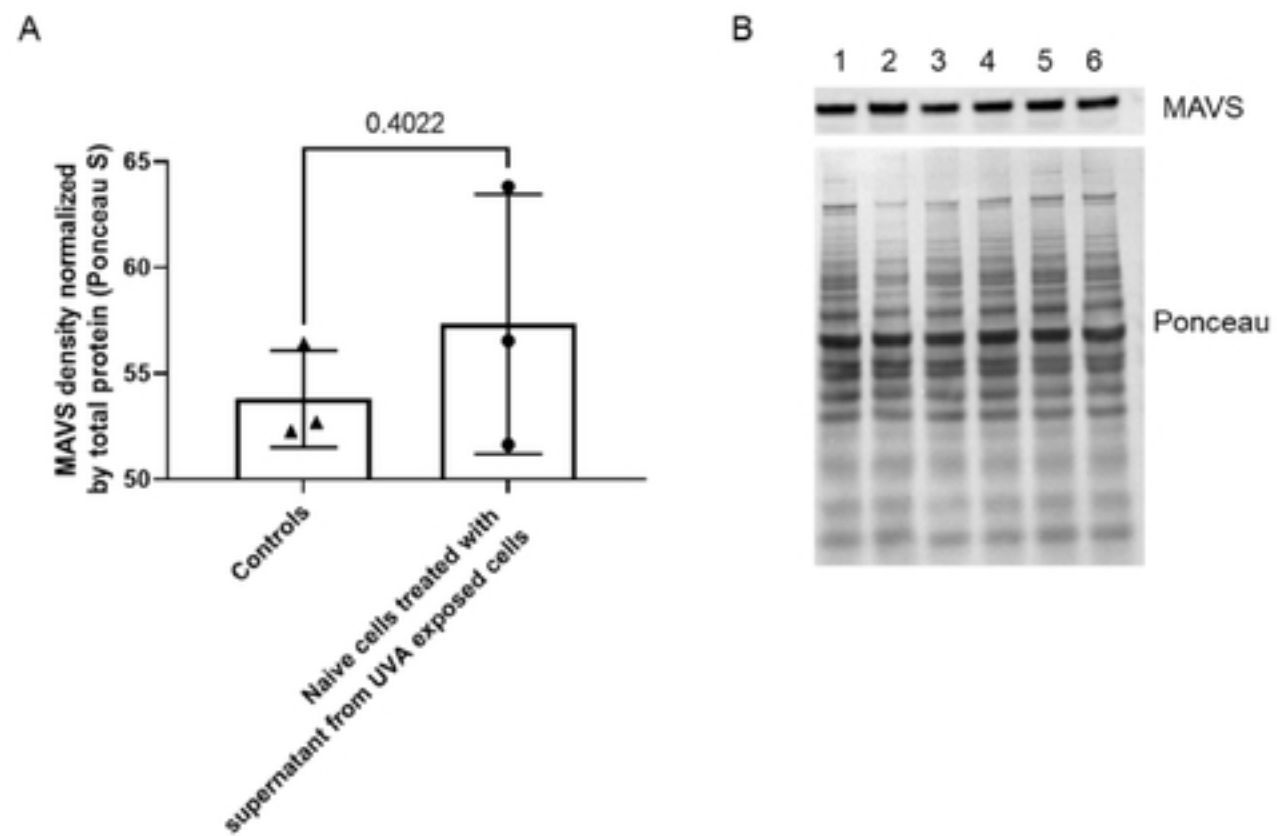

Figure 4

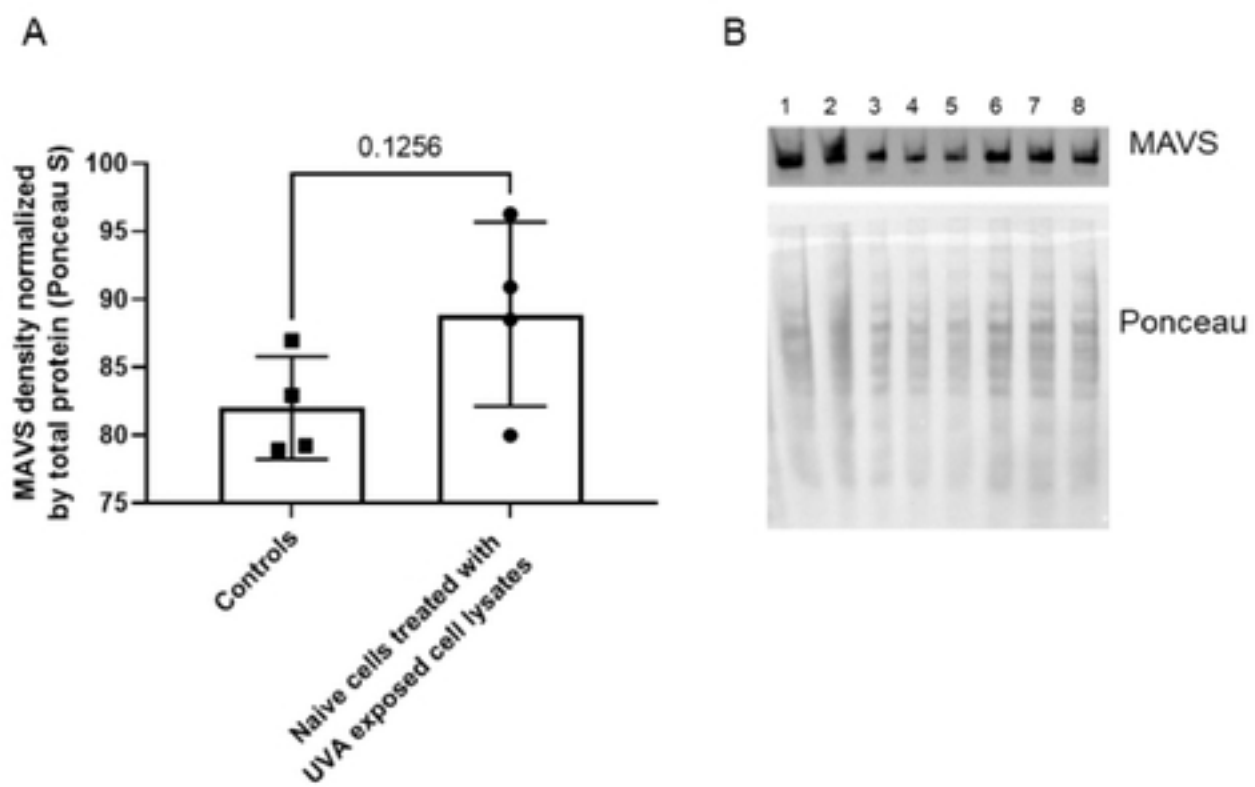

Figure 5

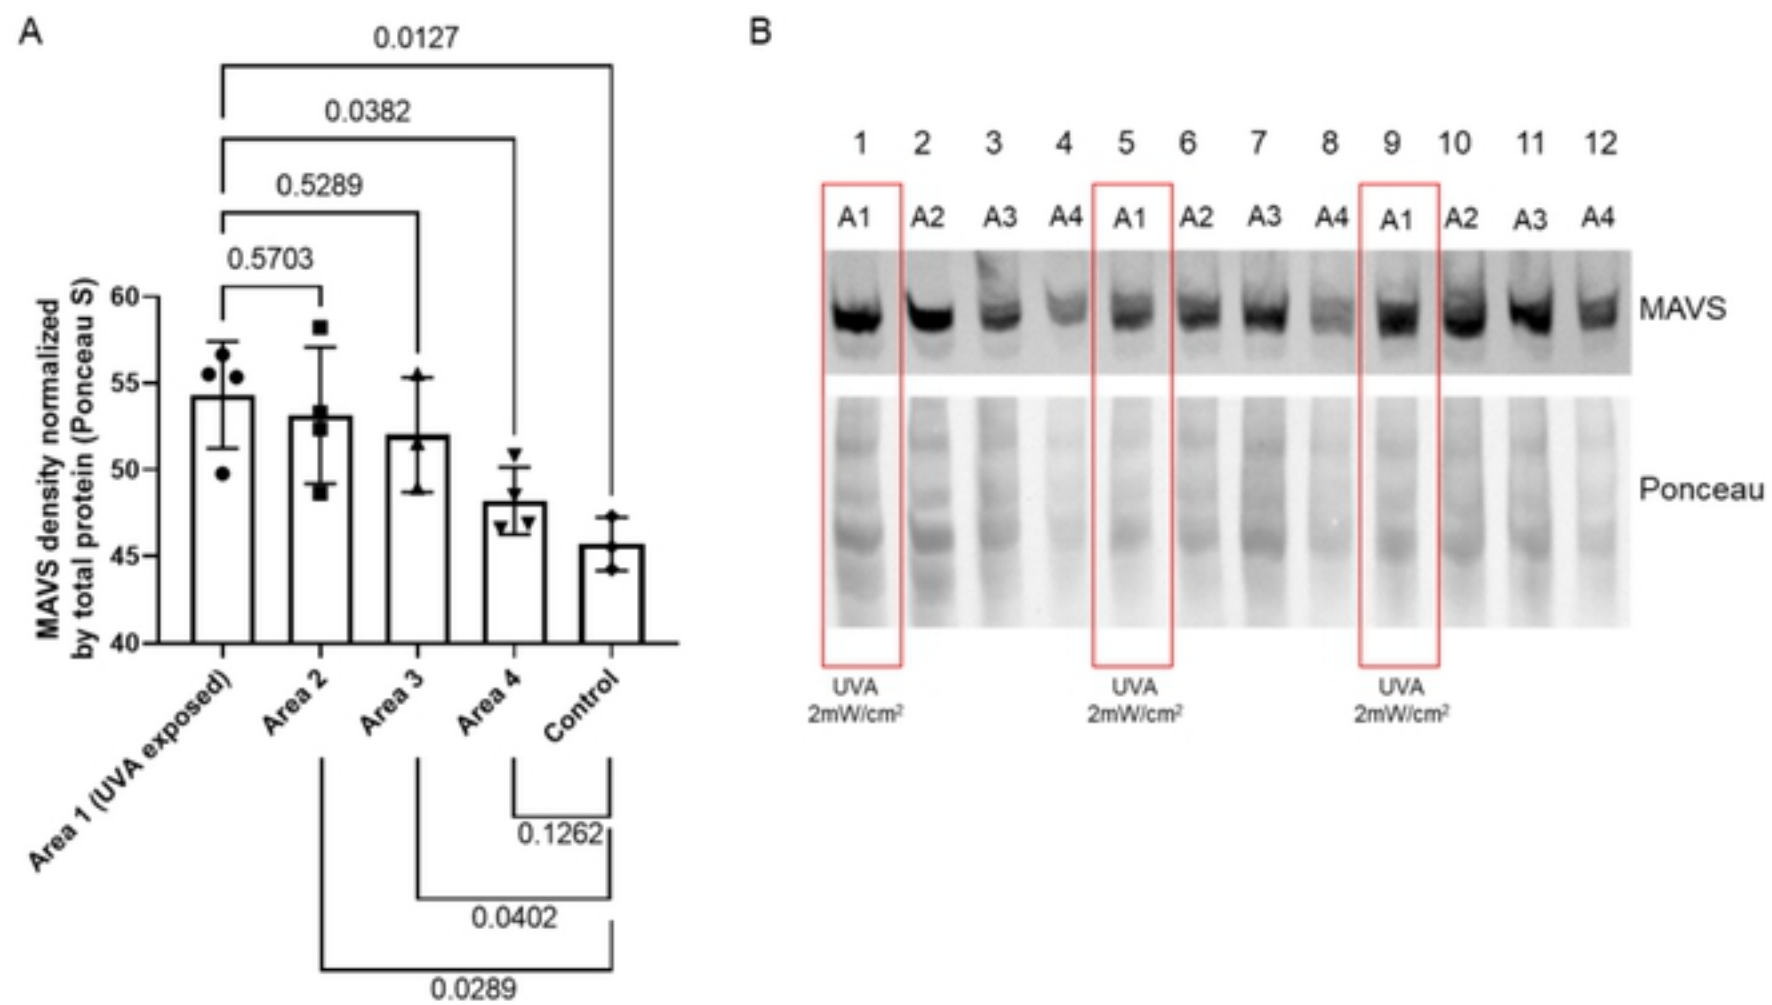

Figure 6
